# Supplementary material for: Ultrahigh piezoelectric coefficient of a lead-free K0.5Na0.5NbO3-based single crystal fabricated by a simple seed-free solid-state growth method
Source: Royal Society of Chemistry journal article supplement (doi:10.1039/c9tc05143k), 2019-01-01
Supplement: c9tc05143k1.pdf [file c9tc05143k1.pdf]

COMMUNICATION

Electronic Supplementary Information

Supplementary figures and tables

**Fig. S1.** A sequence of Laue scan patterns across the sample. (a-d) at 4 different sites of the same plane of the sample (without tilting it), (e-g) at 3 different planes of the same sample by tilting it.

**Fig. S2.** Photographs of 0.375 at.% Mn-doped KNN-based samples sintered at 1090 °C for 5–48 h.

**Fig. S3.** Photo of piezoelectric constant  $d_{33}$  value measured by two different  $d_{33}$  meters at room temperature for 0.375 at.% MnO<sub>2</sub>-doped KNN-based single crystal.

**Fig. S4.** The degradation of  $d_{33}$  versus time for the Mn-doped KNN-based single crystal.

**Fig. S5.** Room temperature ferroelectric P-E loops of (1-x)(99.6KNN-0.4LB)-xMnO<sub>2</sub> crystals. (a)  $x = 0$ , (b)  $x = 0.375\%$ .

**Fig. S6.** (a) Room temperature powder XRD patterns (with Co-K $\alpha$  radiation) of (1-x)(99.6KNN-0.4LB)-xMnO<sub>2</sub> single crystal samples and (b) expanded XRD patterns at  $2\theta = 50-57^\circ$ .

**Table S1.** Comparison of piezoelectric and ferroelectric properties among developed piezoelectric ceramics and crystals.

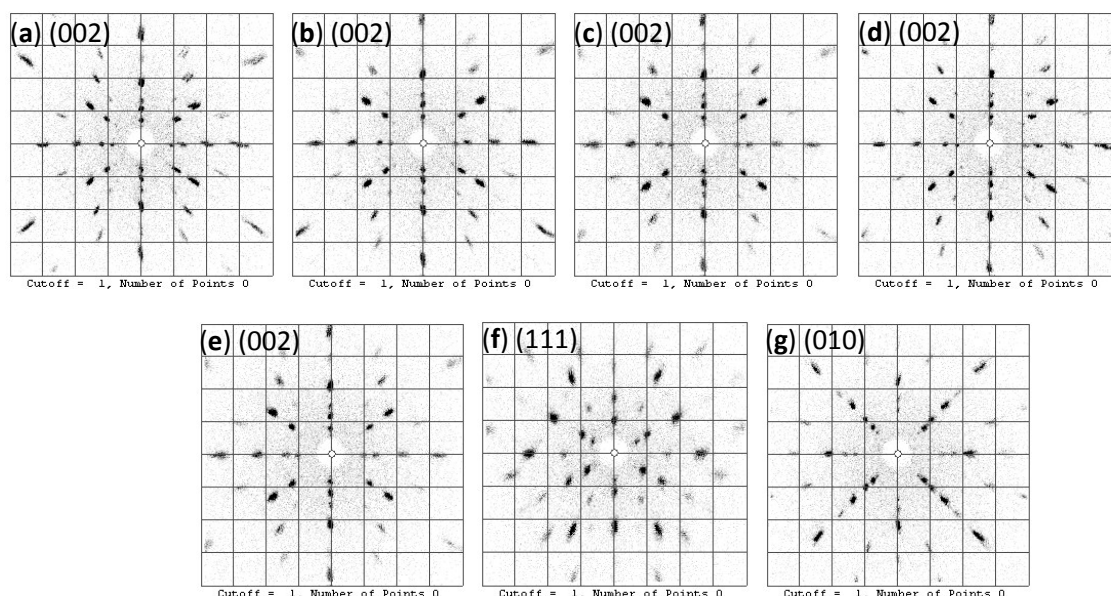

**Fig. S1.** A sequence of Laue scan patterns across the sample. (a-d) at 4 different sites of the same plane of the sample (without tilting it), (e-g) at 3 different planes of the same sample by tilting it.

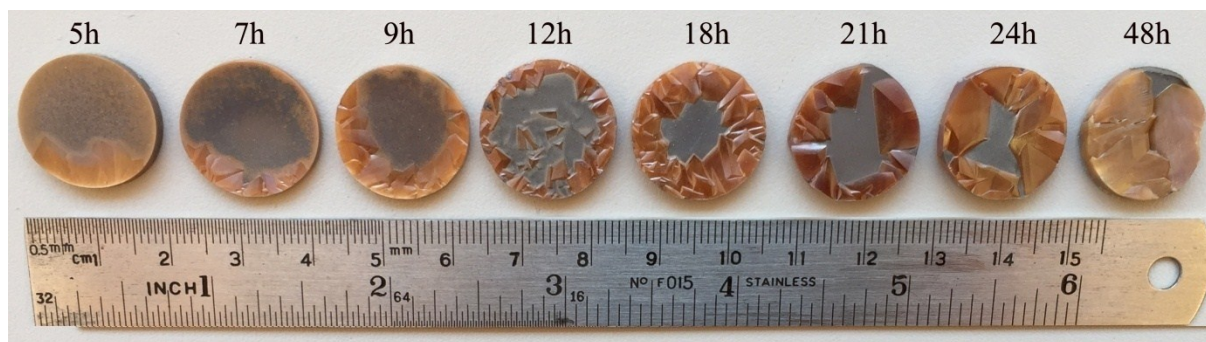

**Fig. S2.** Photographs of 0.375 at.% Mn-doped KNN-based samples sintered at 1090 °C for 5–48 h.

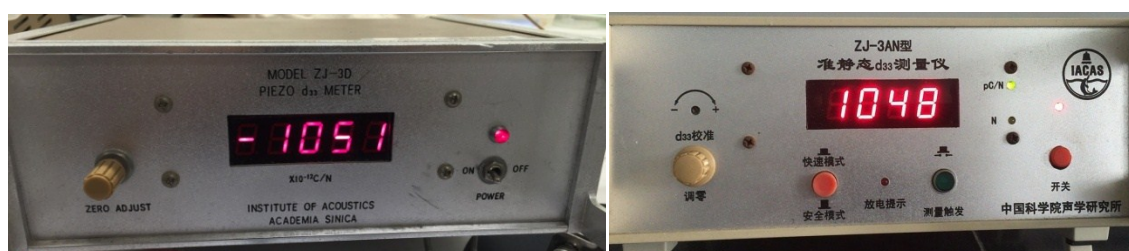

**Fig. S3.** Photo of piezoelectric constant  $d_{33}$  value measured by two different  $d_{33}$  meters at room temperature for 0.375 at.%  $\text{MnO}_2$ -doped KNN-based single crystal.

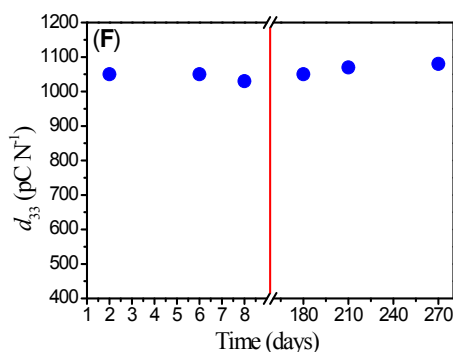

**Fig. S4.** The degradation of  $d_{33}$  versus time for the Mn-doped KNN-based single crystal.

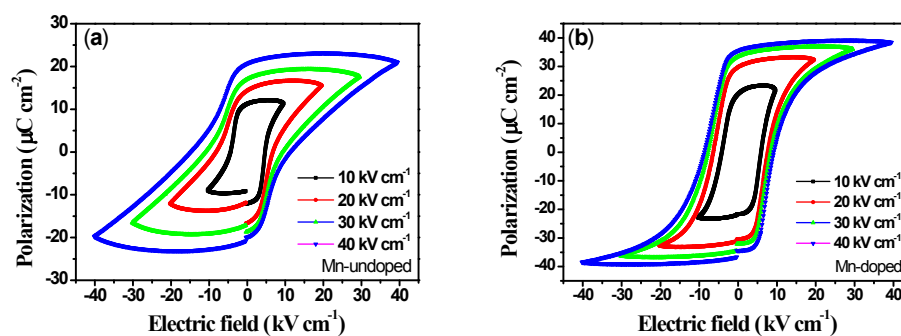

**Fig. S5.** Room temperature ferroelectric P-E loops of  $(1-x)(99.6\text{KNN}-0.4\text{LB})-x\text{MnO}_2$  crystals. (a)  $x = 0$ , (b)  $x = 0.375\%$ .

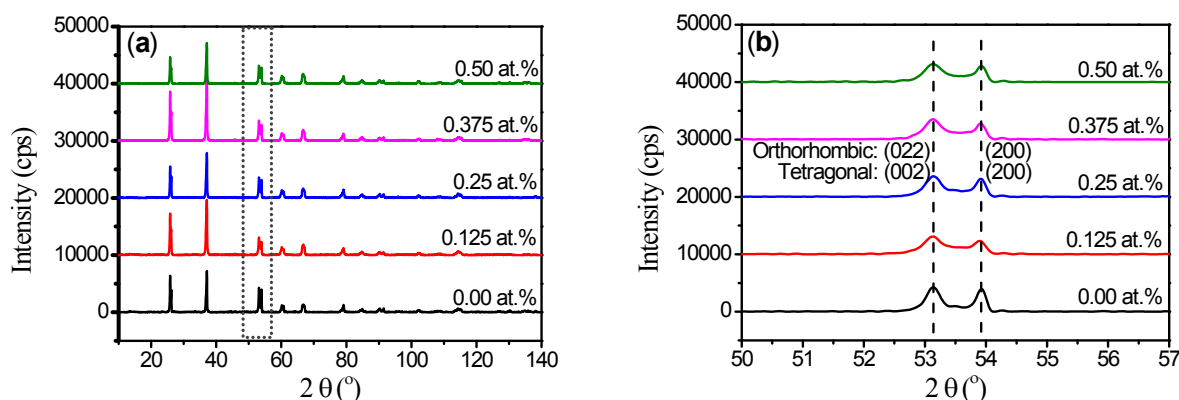

**Fig. S6.** (a) Room temperature powder XRD patterns (with Co-K $\alpha$  radiation) of  $(1-x)(99.6\text{KNN}-0.4\text{LB})-x\text{MnO}_2$  single crystal samples and (b) expanded XRD patterns at  $2\theta = 50-57^\circ$ .

**Table S1.** Comparison of piezoelectric and ferroelectric properties among developed piezoelectric ceramics and crystals.

| Composition           | $d_{33}$ (pC N $^{-1}$ ) | $\epsilon_r$ | $T_c$ ( $^\circ\text{C}$ ) | Growth method       |
|-----------------------|--------------------------|--------------|----------------------------|---------------------|
| KNN-LB: Mn crystal    | 1050                     | 675          | 403                        | SFSSCG(this work)   |
| KNL4Ncrystal          | 689                      | $\sim 450$   | 432                        | SFSSCG[32]          |
| KNN-LB crystal        | 260                      | $\sim 3000$  | 405                        | SFSSCG[11]          |
| KNNTL: Mn crystal     | 545                      | 362          | 235                        | TSSG[25]            |
| KNNLiNbO $_3$ crystal | 405                      | 185          | 426                        | Bridgeman[21]       |
| KNN: Mn crystal       | 270                      | 730          | 416                        | Flux[22]            |
| Textured LF4T ceramic | 416                      | 1570         | 253                        | Textured process[6] |
| KNNS-BNKZ ceramic     | 490                      | $>2000$      | 227                        | Ceramic process[13] |
| KNNS-BZ-BKH           | 570                      | /            | $\sim 190$                 | Ceramic process[14] |
